# Supplementary material for: The Role of Passion and Achievement Goals in Optimal Functioning in Sports
Source: MDPI journal article supplement (doi:10.3390/ijerph18179023), 2021-08-28
Supplement: s1 [file s1]

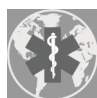

# The Role of Passion and Achievement Goals in Optimal Functioning in Sports - Supplementary

## Measured items

### Passion Scale

While thinking about your sport, please indicate your level of agreement with each of the following items, from 1= do not agree at all to 7 = Agree completely.

|                                                                                                         | 1 | 2 | 3 | 4 | 5 | 6 | 7 |
|---------------------------------------------------------------------------------------------------------|---|---|---|---|---|---|---|
| 1) I am completely taken with synchronized swimming/water polo.                                         |   |   |   |   |   |   |   |
| 2) I cannot live without synchronized swimming/water polo.                                              |   |   |   |   |   |   |   |
| 3) Synchronized swimming/water polo allows me to live memorable experiences.                            |   |   |   |   |   |   |   |
| 4) I am emotionally dependent on synchronized swimming/water polo.                                      |   |   |   |   |   |   |   |
| 5) My mood depends on me being able to do synchronized swimming/water polo.                             |   |   |   |   |   |   |   |
| 6) Synchronized swimming/water polo is in harmony with other activities in my life.                     |   |   |   |   |   |   |   |
| 7) I have a tough time controlling my need to do synchronized swimming/water polo.                      |   |   |   |   |   |   |   |
| 8) The new things I discover with synchronized swimming/water polo allow me to appreciate it even more. |   |   |   |   |   |   |   |
| 9) I have almost an obsessive feeling for synchronized swimming/water polo.                             |   |   |   |   |   |   |   |
| 10) I cannot imagine my life without synchronized swimming/water polo.                                  |   |   |   |   |   |   |   |
| 11) For me synchronized swimming/water polo is a passion, that I can still manage to control.           |   |   |   |   |   |   |   |
| 12) Synchronized swimming/water polo reflects the qualities I like about myself.                        |   |   |   |   |   |   |   |
| 13) Synchronized swimming/water polo allows me to live a variety of experiences.                        |   |   |   |   |   |   |   |

|                                                                                             |  |  |  |  |  |  |  |
|---------------------------------------------------------------------------------------------|--|--|--|--|--|--|--|
| 14) The urge is so strong. I can't help myself from doing synchronized swimming/water polo. |  |  |  |  |  |  |  |
| 15) I spend a lot of time doing it.                                                         |  |  |  |  |  |  |  |
| 16) I like it a lot.                                                                        |  |  |  |  |  |  |  |
| 17) It is important to me.                                                                  |  |  |  |  |  |  |  |
| 18) It is a passion for me.                                                                 |  |  |  |  |  |  |  |

### Achievement Goals Questionnaire

Using the 1-7 scale below, indicate the extent to which you believe each item to be true for you.

|                                                                                                                     | 1 | 2 | 3 | 4 | 5 | 6 | 7 |
|---------------------------------------------------------------------------------------------------------------------|---|---|---|---|---|---|---|
| 1) It is important for me to develop my skills as thoroughly as possible this season.                               |   |   |   |   |   |   |   |
| 2) My goal this season is to avoid swimming badly.                                                                  |   |   |   |   |   |   |   |
| 3) It is important for me to do well compared to other swimmers this season.                                        |   |   |   |   |   |   |   |
| 4) I want to develop my skills as much as possible this season.                                                     |   |   |   |   |   |   |   |
| 5) My fear of doing poorly this season is often what motivates me.                                                  |   |   |   |   |   |   |   |
| 6) I want to swim at the top of my ability by the end of the season.                                                |   |   |   |   |   |   |   |
| 7) It is important to me to swim better than other swimmers.                                                        |   |   |   |   |   |   |   |
| 8) I just want to avoid swimming badly this season.                                                                 |   |   |   |   |   |   |   |
| 9) I hope to have improved and broadened my skill set by the end of the season.                                     |   |   |   |   |   |   |   |
| 10) I want to swim well this season so that I can show my skills to my friends, family, coaches, or others.         |   |   |   |   |   |   |   |
| 11) I often ask myself, "What will happen if I don't swim well this season?"                                        |   |   |   |   |   |   |   |
| 12) In a competitive network like this, I prefer to swim against swimmers who push me to develop my skills further. |   |   |   |   |   |   |   |
| 13) This season, I am trying to demonstrate my skills compared to other swimmers.                                   |   |   |   |   |   |   |   |

|                                                                                                                                                   |  |  |  |  |  |  |  |
|---------------------------------------------------------------------------------------------------------------------------------------------------|--|--|--|--|--|--|--|
| 14) My goal this season is to swim better than most other swimmers.                                                                               |  |  |  |  |  |  |  |
| 15) In a competitive network like this, I prefer to swim against talented swimmers, even if it means I must work harder when I swim against them. |  |  |  |  |  |  |  |
| 16) I am motivated to surpass other swimmers this season.                                                                                         |  |  |  |  |  |  |  |
| 17) The possibility of swimming poorly this season worries me.                                                                                    |  |  |  |  |  |  |  |
| 18) I'm afraid that if I don't swim well, others will think I don't have much talent.                                                             |  |  |  |  |  |  |  |

### Coach-athlete relationship

Below are five statements that you may agree or disagree with. Using the 1-7 scale below, identify to which level you have felt that way since the beginning of your competitive season.

I have felt ....

|                                        | 1 | 2 | 3 | 4 | 5 | 6 | 7 |
|----------------------------------------|---|---|---|---|---|---|---|
| 1) ...supported <b>by my coach</b> .   |   |   |   |   |   |   |   |
| 2) ...trust <b>in my coach</b> .       |   |   |   |   |   |   |   |
| 3) ...understood <b>by my coach</b> .  |   |   |   |   |   |   |   |
| 4) ...listened to <b>by my coach</b> . |   |   |   |   |   |   |   |
| 5) ...valued <b>by my coach</b> .      |   |   |   |   |   |   |   |

### Performance

Using the scale of 1 to 7, indicate the extent to which you agree with the statements below.

|                                                                                   | 1 | 2 | 3 | 4 | 5 | 6 | 7 |
|-----------------------------------------------------------------------------------|---|---|---|---|---|---|---|
| 1) I feel efficient in the different aspects of synchronized swimming/water polo. |   |   |   |   |   |   |   |
| 2) I feel competent in synchronized swimming/water polo.                          |   |   |   |   |   |   |   |
| 3) Overall, I feel I am good at synchronized swimming/water polo.                 |   |   |   |   |   |   |   |
| 4) I feel I have many skills in synchronized swimming/water polo.                 |   |   |   |   |   |   |   |
| 5) I expect to do well this season.                                               |   |   |   |   |   |   |   |
| 6) I think I will swim well this season.                                          |   |   |   |   |   |   |   |
| 7) I get the most out of my talent and my skills.                                 |   |   |   |   |   |   |   |
| 8) I am confident that I can swim                                                 |   |   |   |   |   |   |   |

|                                                                             |  |  |  |  |  |  |  |
|-----------------------------------------------------------------------------|--|--|--|--|--|--|--|
| well.                                                                       |  |  |  |  |  |  |  |
| 9) I tend to swim better under pressure because I think better.             |  |  |  |  |  |  |  |
| 10) The more pressure there is during my routine, the more I like it.       |  |  |  |  |  |  |  |
| 11) For me, situations where there is pressure are challenges that I enjoy. |  |  |  |  |  |  |  |
| 12) I make fewer mistakes when there is pressure because I focus better.    |  |  |  |  |  |  |  |

### Satisfaction With Life Scale

Below are five statements that you may agree or disagree with. Using the 1-7 scale below, indicate your agreement with each item by placing the appropriate number on the line preceding that item. Please be open and honest in your responding.

|                                                                 | <b>1</b> | <b>2</b> | <b>3</b> | <b>4</b> | <b>5</b> | <b>6</b> | <b>7</b> |
|-----------------------------------------------------------------|----------|----------|----------|----------|----------|----------|----------|
| 1) In most ways my life is close to my ideal.                   |          |          |          |          |          |          |          |
| 2) The conditions of my life are excellent.                     |          |          |          |          |          |          |          |
| 3) I am satisfied with my life.                                 |          |          |          |          |          |          |          |
| 4) So far, I have gotten the important things I want in life.   |          |          |          |          |          |          |          |
| 5) If I could live my life over, I would change almost nothing. |          |          |          |          |          |          |          |

### Intentions to continue in sport

Using the scale of 1 to 7, indicate the extent to which you agree with the statements below.

In the future ...

|                                                                       | <b>1</b> | <b>2</b> | <b>3</b> | <b>4</b> | <b>5</b> | <b>6</b> | <b>7</b> |
|-----------------------------------------------------------------------|----------|----------|----------|----------|----------|----------|----------|
| 1) ...I will continue to do synchronized swimming/water polo.         |          |          |          |          |          |          |          |
| 2) ... I will spend more time doing synchronized swimming/water polo. |          |          |          |          |          |          |          |
| 3) ... I intend to make synchronized swimming/water polo a career.    |          |          |          |          |          |          |          |
| 4) ... I intend to give up synchronized swimming/water polo.          |          |          |          |          |          |          |          |
